# Supplementary material for: Effect of Antimicrobial Use in Conventional Versus Natural Cattle Feedlots on the Microbiome and Resistome
Source: MDPI journal article supplement (doi:10.3390/microorganisms11122982), 2023-12-14
Supplement: s1 [file s1]

## Supplementals

**Table S1.** Pen level Metadata of animals used to collect fecal composite samples. Sex listed without “Yearling” are calves.

| Pen-level Fecal Composite Sample ID | Age/Sex                  |
|-------------------------------------|--------------------------|
| Nat-Win-B-25Oct16-M1                | Yearling, Steers         |
| Nat-Win-B-25Oct16-M2                | Yearling, heifers        |
| Con-Win-A-22Oct16-M4                | Yearling, Steers         |
| Nat-Win-C-31Jan17-M7                | Steers                   |
| Con-Win-D-1Feb17-M9                 | Yearling, Steers         |
| Con-Win-D-2Feb17-M10                | Yearling, Heifers        |
| Nat-Sum-B-28Jun17-M17               | Yearling steers          |
| Nat-Sum-B-28Jun17-M18               | Yearling heifers         |
| Nat-Win-B-1Mar17-MG2                | Yearling, Heifers        |
| Con-Win-A-1Mar17-MG3                | Yearling, Not segregated |
| Con-Win-A-1Mar17-MG4                | Yearling, Not segregated |
| Nat-Sum-B-26Apr17-MG5               | Yearling, Steers         |
| Nat-Sum-B-26Apr17-MG6               | Yearling, Heifers        |
| Con-Sum-A-26Apr17-MG7               | Yearling, Heifers        |
| Con-Sum-A-26Apr17-MG8               | Yearling, Steers         |
| Nat-Sum-C-10Apr18-MG9               | Steers                   |
| Nat-Sum-C-10Apr18-MG10              | Heifers                  |
| Con-Sum-D-10Apr18-MG11              | Yearling, Not segregated |
| Con-Sum-D-10Apr18-MG12              | Yearling, Not segregated |
| Nat-Win-B-13Mar18-MG13              | Not segregated           |
| Nat-Win-B-13Mar18-MG14              | Not segregated           |
| Con-Win-A-13Mar18-MG15              | Yearling, Not segregated |
| Con-Win-A-13Mar18-MG16              | Yearling, Not segregated |
| Nat-Sum-C-26Jun18-MG17              | Steers                   |
| Nat-Sum-C-26Jun18-MG18              | Heifers                  |
| Con-Sum-D-26Jun18-MG19              | Yearling, Not segregated |
| Con-Sum-D-26Jun18-MG20              | Yearling, Not segregated |
| Nat-Sum-B-25Jul18-MG21              | Yearling, Steers         |
| Nat-Sum-B-25Jul18-MG22              | Yearling, Heifers        |
| Con-Sum-A-25Jul18-MG23              | Yearling, Not segregated |
| Con-Sum-A-25Jul18-MG24              | Yearling, Not segregated |
| Nat-Sum-C-1Aug17-MG25               | Heifers                  |
| Nat-Sum-C-1Aug17-MG26               | Heifers                  |
| Con-Sum-D-1Aug17-MG27               | Yearling, Heifers        |
| Con-Sum-D-1Aug17-MG28               | Yearling, Steers         |
| Nat-Win-C-24Oct17-MG29              | Heifers                  |
| Con-Win-D-24Oct17-MG31              | Yearling, Steers         |
| Con-Win-D-24Oct17-MG32              | Yearling, Heifers        |
| Nat-Win-C-29Jan18-MG33              | Heifers                  |
| Nat-Win-C-29Jan18-MG34              | Heifers                  |
| Con-Win-D-29Jan18-MG35              | Yearling, Heifers        |
| Con-Win-D-29Jan18-MG36              | Yearling, Steers         |

|                        |                   |
|------------------------|-------------------|
| Nat-Sum-B-05Sep17-MG41 | Yearling, Steers  |
| Nat-Sum-B-05Sep17-MG42 | Yearling, Heifers |
| Con-Sum-A-05Sep17-MG43 | Yearling, Steers  |
| Con-Sum-A-05Sep17-MG44 | Yearling, Heifers |
| Nat-Sum-B-29May18-MG45 | Yearling, no data |
| Nat-Sum-B-29May18-MG46 | Yearling, no data |
| Con-Sum-A-29May18-MG47 | Yearling, Heifers |
| Con-Sum-A-29May18-MG48 | Yearling, Steers  |
| Con-Win-A-25Oct16-MG49 | Yearling, Heifers |
| Nat-Win-C-31Jan17-MG50 | Heifers           |
| Nat-Win-B-11Dec17-MG53 | Yearling, Steers  |
| Nat-Win-B-11Dec17-MG54 | Yearling, Heifers |
| Con-Win-A-11Dec17-MG55 | Yearling, Steers  |
| Con-Win-A-11Dec17-MG56 | Yearling, Heifers |
| Nat-Win-C-29Mar17-MG57 | Heifers           |
| Nat-Win-C-29Mar17-MG58 | Steers            |
| Con-Win-D-29Mar17-MG59 | Yearling, Heifers |
| Con-Win-D-29Mar17-MG60 | Yearling, Steers  |

4

**Table S2.** Most abundant archaeal and bacterial classes (>1%) and orders (top 20) of fecal and catch basin water samples with mean normalized abundance, interpreted significance of adjusted p-value ( $q > 0.05 = \text{ns}$ ;  $q < 0.05 = *$ ;  $q < 0.01 = **$ ;  $q < 0.001 = ***$ ;  $q < 0.0001 = ****$ ), and fold change for significant differences from natural (NAT) to conventional (CONV).

5

6

7

8

| Sample Type     | Taxa Level | Taxon                 | CONV Mean Normalized Abundance | NAT Mean Normalized Abundance | Interpreted Significance | Fold Change |
|-----------------|------------|-----------------------|--------------------------------|-------------------------------|--------------------------|-------------|
| Fecal Composite | Class      | Actinobacteria        | 0.055                          | 0.066                         | **                       | 1.09        |
|                 |            | Alphaproteobacteria   | 0.041                          | 0.045                         | ns                       | -           |
|                 |            | Bacilli               | 0.078                          | 0.091                         | *                        | 1.06        |
|                 |            | Bacteroidia           | 0.210                          | 0.168                         | ***                      | 0.81        |
|                 |            | Betaproteobacteria    | 0.031                          | 0.033                         | ns                       | -           |
|                 |            | Chlorobia             | 0.002                          | 0.002                         | ns                       | -           |
|                 |            | Clostridia            | 0.271                          | 0.307                         | ns                       | -           |
|                 |            | Coriobacteriia        | 0.012                          | 0.014                         | ns                       | -           |
|                 |            | Cytophagia            | 0.014                          | 0.014                         | ns                       | -           |
|                 |            | Deltaproteobacteria   | 0.016                          | 0.017                         | ns                       | -           |
|                 |            | Epsilonproteobacteria | 0.012                          | 0.009                         | ****                     | 0.97        |
|                 |            | Flavobacteriia        | 0.039                          | 0.038                         | *                        | 0.93        |
|                 |            | Gammaproteobacteria   | 0.096                          | 0.091                         | *                        | 0.91        |
|                 |            | Methanobacteria       | 0.014                          | 0.006                         | ***                      | 0.58        |
|                 |            | Mollicutes            | 0.007                          | 0.009                         | **                       | 1.11        |
|                 |            | Negativicutes         | 0.014                          | 0.012                         | ns                       | -           |
|                 |            | Spirochaetia          | 0.029                          | 0.015                         | **                       | 0.69        |
|                 | Order      | Alteromonadales       | 0.009                          | 0.008                         | *                        | 0.88        |
|                 |            | Bacillales            | 0.051                          | 0.059                         | *                        | 1.05        |
|                 |            | Bacteroidales         | 0.210                          | 0.167                         | ***                      | 0.80        |
|                 |            | Bifidobacteriales     | 0.006                          | 0.011                         | ***                      | 1.33        |
|                 |            | Burkholderiales       | 0.023                          | 0.024                         | ns                       | -           |

|                   |       |                       |       |       |      |      |
|-------------------|-------|-----------------------|-------|-------|------|------|
|                   |       | Campylobacterales     | 0.012 | 0.009 | **** | 0.77 |
|                   |       | Caulobacterales       | -     | -     | -    | -    |
|                   |       | Chromatiales          | -     | -     | -    | -    |
|                   |       | Clostridiales         | 0.266 | 0.301 | ns   | -    |
|                   |       | Corynebacterales      | 0.012 | 0.013 | ns   | -    |
|                   |       | Cytophagales          | 0.014 | 0.014 | ns   | -    |
|                   |       | Desulfovibrionales    | -     | -     | -    | -    |
|                   |       | Enterobacterales      | 0.026 | 0.024 | *    | 0.90 |
|                   |       | Erysipelotrichales    | 0.010 | 0.011 | ns   | -    |
|                   |       | Flavobacteriales      | 0.040 | 0.039 | *    | 0.92 |
|                   |       | Lactobacillales       | 0.026 | 0.030 | *    | 1.04 |
|                   |       | Methanobacteriales    | 0.014 | 0.006 | ***  | 0.57 |
|                   |       | Micrococcales         | 0.009 | 0.010 | ns   | -    |
|                   |       | Nitrosomonadales      | -     | -     | -    | -    |
|                   |       | Pseudomonadales       | 0.020 | 0.020 | ns   | -    |
|                   |       | Rhizobiales           | 0.016 | 0.018 | ns   | -    |
|                   |       | Rhodobacterales       | -     | -     | -    | -    |
|                   |       | Rhodocyclales         | -     | -     | -    | -    |
|                   |       | Sphingomonadales      | -     | -     | -    | -    |
|                   |       | Spirochaetales        | 0.027 | 0.013 | **   | 0.66 |
|                   |       | Streptomycetales      | 0.009 | 0.010 | ns   | -    |
|                   |       | Xanthomonadales       | -     | -     | -    | -    |
| Catch Basin Water | Class | Actinobacteria        | 0.096 | 0.122 | *    | 0.99 |
|                   |       | Alphaproteobacteria   | 0.154 | 0.116 | ns   | -    |
|                   |       | Bacilli               | 0.017 | 0.029 | **** | 1.06 |
|                   |       | Bacteroidia           | 0.019 | 0.041 | **** | 1.01 |
|                   |       | Betaproteobacteria    | 0.229 | 0.251 | ns   | -    |
|                   |       | Clostridia            | 0.018 | 0.057 | ns   | -    |
|                   |       | Cytophagia            | 0.009 | 0.015 | ns   | -    |
|                   |       | Deltaproteobacteria   | 0.105 | 0.08  | ns   | -    |
|                   |       | Epsilonproteobacteria | 0.018 | 0.015 | ns   | -    |
|                   |       | Flavobacteriia        | 0.030 | 0.041 | **** | 1.13 |
|                   |       | Gammaproteobacteria   | 0.249 | 0.161 | ns   | -    |
|                   |       | Methanobacteria       | 0.000 | 0.002 | **** | 1.18 |
|                   | Order | Bacillales            | 0.012 | 0.02  | ns   | -    |
|                   |       | Bacteroidales         | 0.018 | 0.04  | ns   | -    |
|                   |       | Burkholderiales       | 0.174 | 0.202 | ns   | -    |
|                   |       | Campylobacterales     | 0.019 | 0.015 | ns   | -    |
|                   |       | Caulobacterales       | 0.017 | 0.01  | ns   | -    |
|                   |       | Chromatiales          | 0.085 | 0.016 | ns   | -    |
|                   |       | Clostridiales         | 0.017 | 0.055 | ns   | -    |
|                   |       | Corynebacterales      | 0.018 | 0.022 | ns   | -    |
|                   |       | Desulfovibrionales    | 0.086 | 0.062 | ns   | -    |
|                   |       | Enterobacterales      | 0.019 | 0.018 | ns   | -    |
|                   |       | Flavobacteriales      | 0.031 | 0.042 | ns   | -    |
|                   |       | Micrococcales         | 0.022 | 0.025 | ns   | -    |
|                   |       | Nitrosomonadales      | 0.011 | 0.02  | ns   | -    |
|                   |       | Pseudomonadales       | 0.062 | 0.056 | ns   | -    |
|                   |       | Rhizobiales           | 0.052 | 0.045 | ns   | -    |

|  |  |                  |       |       |    |   |
|--|--|------------------|-------|-------|----|---|
|  |  | Rhodobacterales  | 0.047 | 0.031 | ns | - |
|  |  | Rhodocyclales    | 0.038 | 0.023 | ns | - |
|  |  | Sphingomonadales | 0.021 | 0.015 | ns | - |
|  |  | Streptomycetales | 0.023 | 0.026 | ns | - |
|  |  | Xanthomonadales  | 0.018 | 0.016 | ns | - |

9

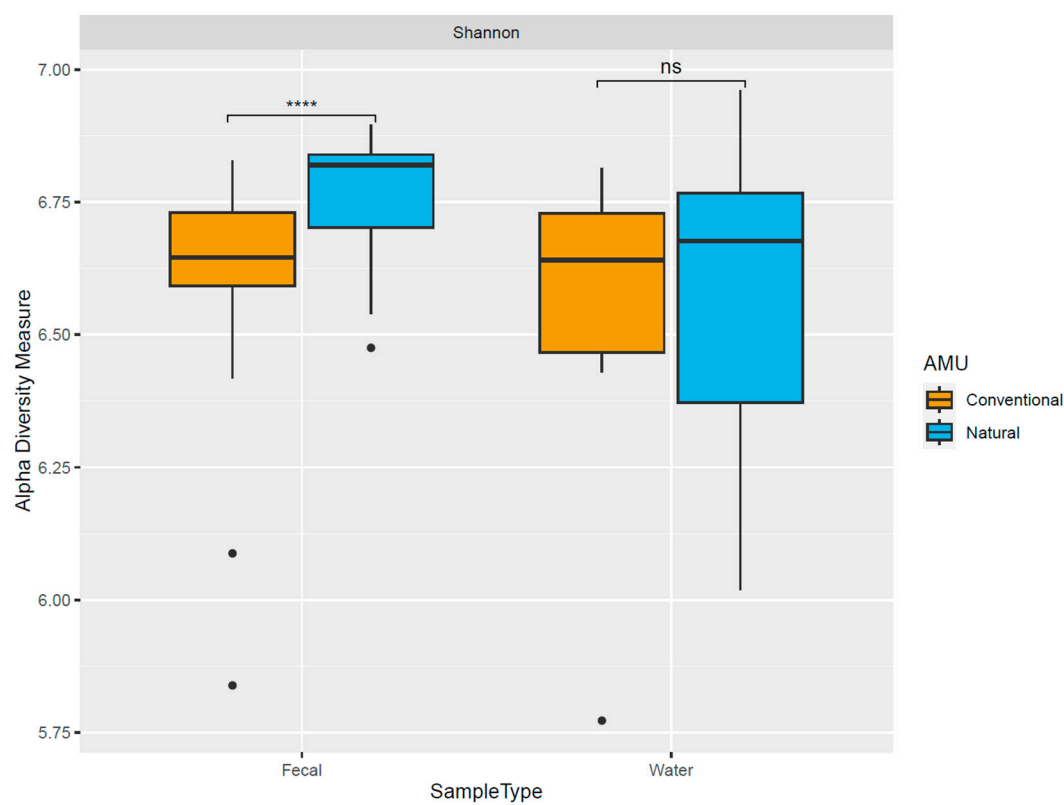

10

**Figure S1.** Boxplot of Shannon index comparisons between conventional and natural feedlots for fecal and catch basin water samples. (Wilcoxon signed rank test;  $p > 0.05$  = ns;  $p < 0.0001$  = \*\*\*\*)

11

12

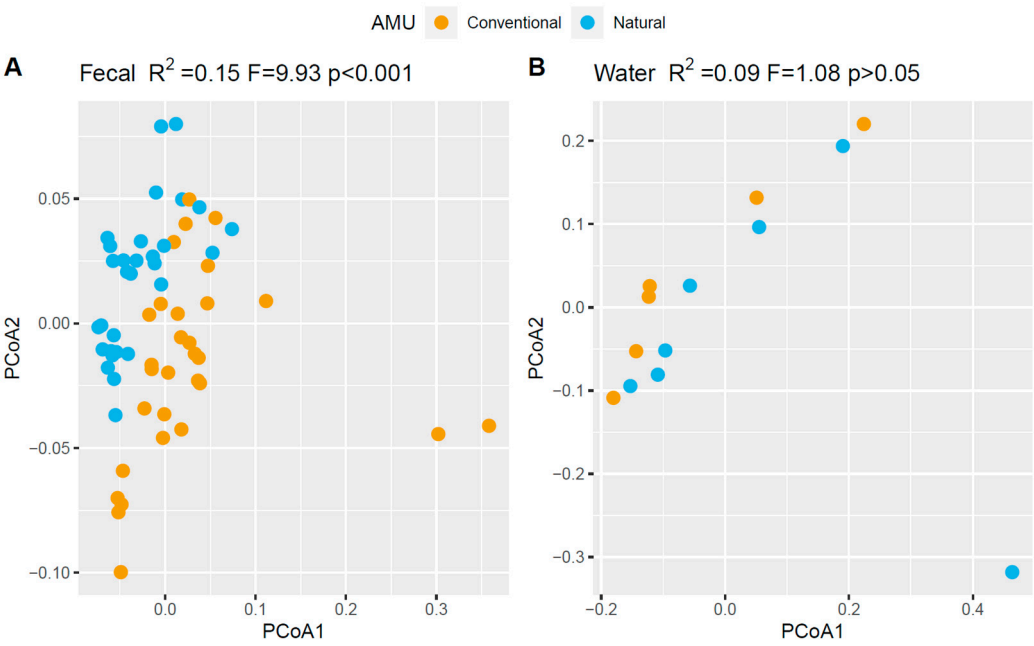

**Figure S2.** Principle component analyses (PCoA) of beta diversity differences using Bray-Curtis for fecal (A) and catch basin water (B) samples between conventional and natural feedlot types. (PER-MANOVA test)

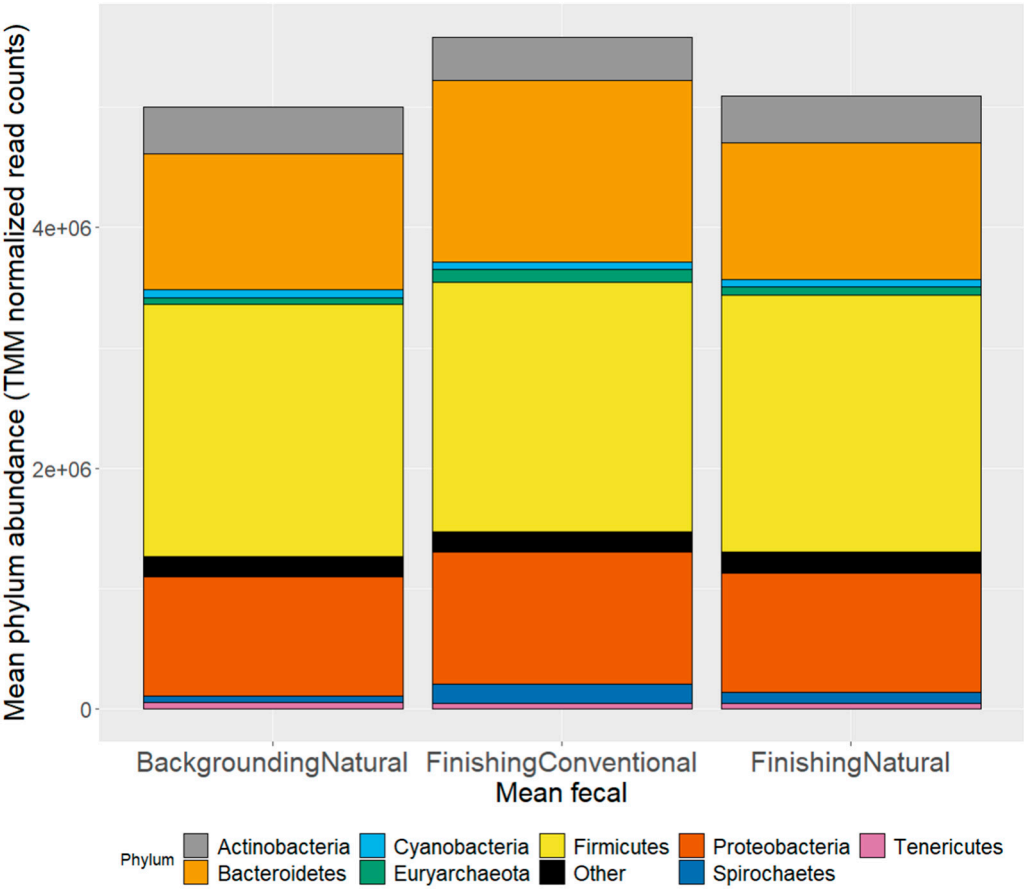

13

14

15

16

17

18

**Figure S3.** Stacked bar plots comparing TMM (trimmed mean of m-values) normalized mean read counts per sample of prevalent phyla (>1%) across fecal sample diet (Backgrounding vs Finishing) and feedlot management practices (Conventional vs Natural).

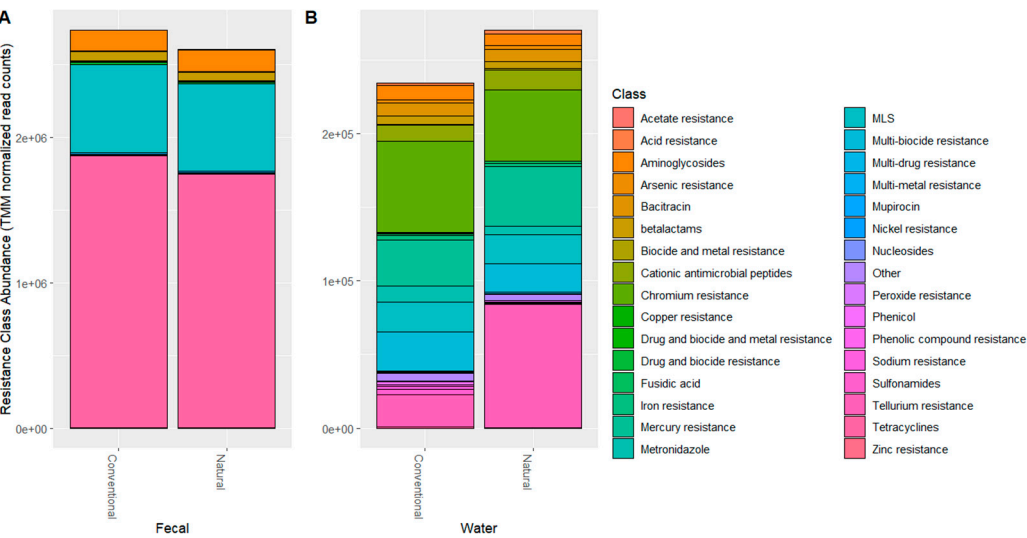

**Figure S4.** Stacked bar plots of TMM (trimmed mean of m-values) normalized read counts per feedlot management practice for fecal (A) and catch basin water (B) antimicrobial resistance gene classes.

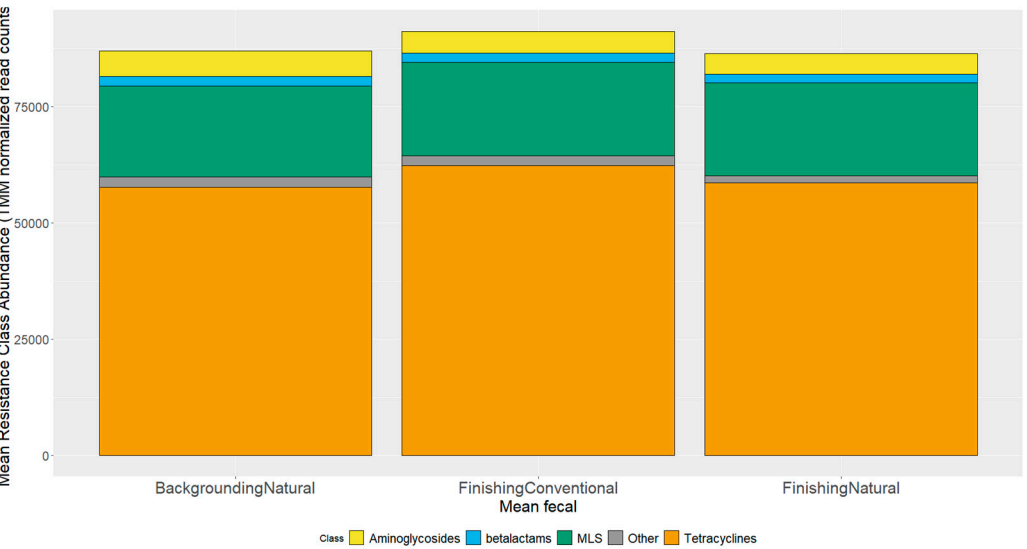

**Figure S5.** Stacked bar plots comparing TMM (trimmed mean of m-values) normalized mean read counts per sample of prevalent antimicrobial resistance gene classes (>1%) across fecal sample diet (Backgrounding vs Finishing) and feedlot management practices (Conventional vs Natural).
